# Supplementary material for: Lentiviral-Induced Spinal Cord Gliomas in Rat Model
Source: MDPI journal article supplement (doi:10.3390/ijms222312943), 2021-11-30
Supplement: s1 [file s1]

**Figure S1**

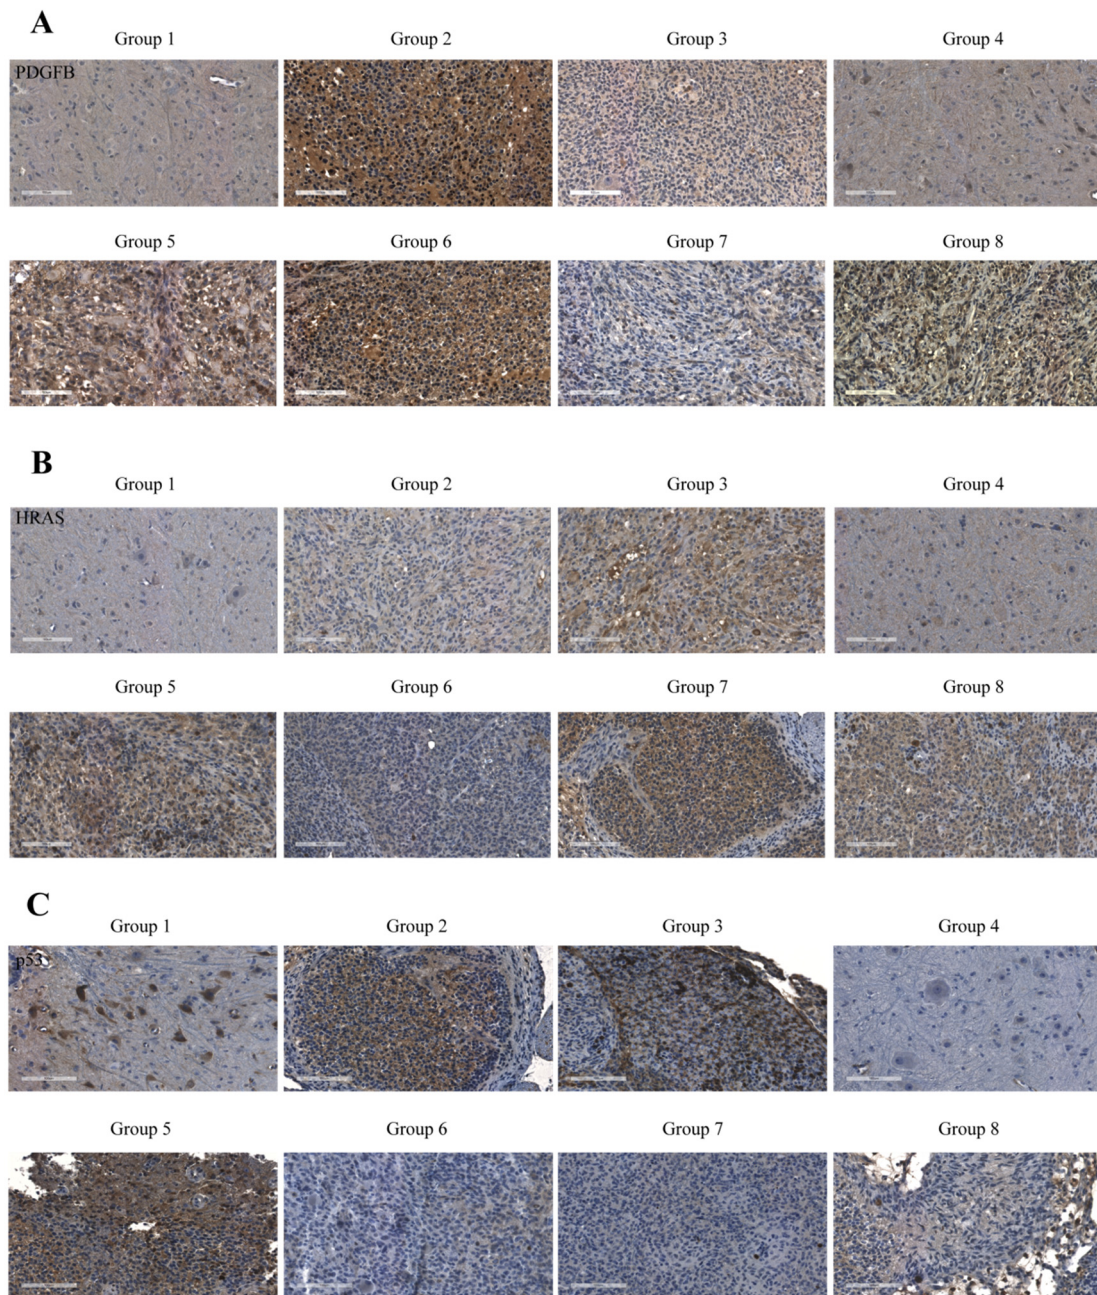

**Figure S1. Immunohistochemical confirmation of lentiviral vector delivery and expression.** Standard fixed, paraffin-embedded staining protocols with tris mediated antigen retrieval were applied to 8um thick serial sections. Stains for PDGF-B, HRAS, and p53 were performed to confirm that our vectors were delivered in our target tissue and appropriately expressed. **A:** PDGF-B positive staining was displayed in the four groups injected with PDGF-B (groups 2, 5, 6, 8). **B:** HRAS positivity was seen in the four groups injected with HRAS (groups 3, 5, 7, 8). **C:** P53 positive staining was displayed in the groups not injected with our p53 knockdown (groups 1, 2, 3, 5). Scale Bar = 100 um.

**Figure S2**

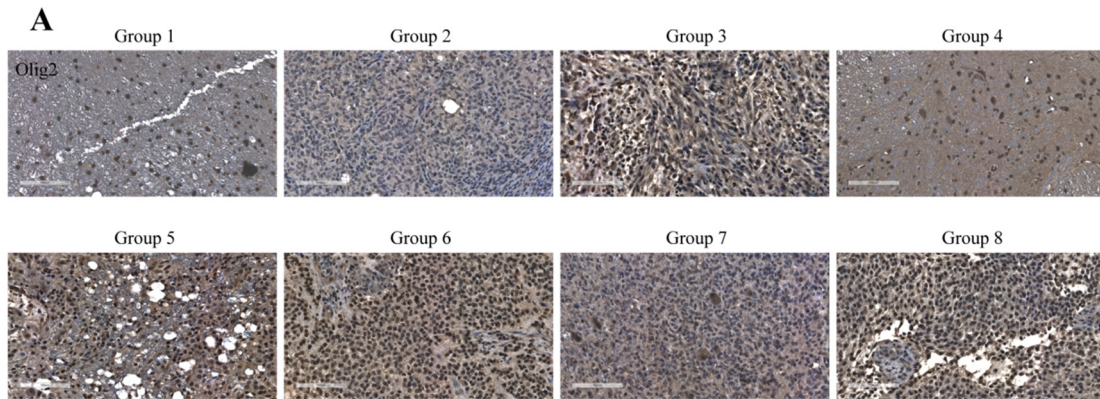

**Figure S2. Immunohistochemical characterization of spinal cord lesions displaying oligodendroglial phenotype.** Standard fixed, paraffin-embedded staining protocols with tris mediated antigen retrieval were applied to 8um thick serial sections. A) IHC staining for Olig2, a marker of oligodendroglial phenotype. Increased positive staining was displayed in groups injected with HRAS alone, PDGF-B+HRAS, PDGF-B+sh-p53, HRAS+sh-p53, and triple cocktail (groups 3, 5, 6, 7, 8). Scale Bar = 100 um.
